# Supplementary material for: Integrated genome and transcriptome sequencing identifies a noncoding mutation in the genome replication factor DONSON as the cause of microcephaly-micromelia syndrome
Source: Genome Res. 2017 Aug;27(8):1323–35. doi: 10.1101/gr.219899.116 (PMC5538549; doi:10.1101/gr.219899.116)
Supplement: Supplemental Material [file supp_gr.219899.116_Supplemental_Data_1.xlsx]

## Sheet: Samples
Individual	Sample type		Affected	Gender	Relationship	Gestational age at birth [weeks]	Birth weight [grams] (z-score)	Birth length [cm] (z-score)	Birth head circumference [cm] (z-score)	Genotyping	SNP microarray			Array CGH	Whole-exome seq		Targeted-capture seq		Whole-genome seq		RNA-seq		RT-PCR
										Donson variant genotype	Performed	Platform	Comment	Performed	Performed	Comment	Performed	Comment	Performed	Comment	Performed	Comment	Performed	Comment
402	Blood	DNA	Yes	Female	Affected child	40	1240 (-6.4)	33 (-7.7)	24.5 (-7.4)	C/C	Yes	Illumina Omni 2.5
401	Blood	DNA	No	Female	Mother of 402					T/C	Yes	Illumina Omni 2.5
412	Blood	DNA	Yes	Female	Affected child	38	950 (-6.5)	30.5 (-7.5)	Not available	C/C	Yes	Affymetrix 5.0	Not used in linkage analysis		Yes	158 M reads
411	Blood	DNA	No	Male	Father of 412					T/C
414	Blood	DNA	Yes	Male	Affected child	36				C/C	Yes	Affymetrix 5.0	Not used in linkage analysis
421	Blood	DNA	Yes	Female	Affected child	22	250 (-5.0)	23.5 (-2.5)	14.8 (-4.2)	C/C	Yes	Illumina Omni 2.5
421	Umbilical cord (fresh-frozen)	RNA	Yes	Female	Affected child																Yes	130 M reads	Yes
417	Blood	DNA	No	Female	Mother of 421					T/C	Yes	Illumina Omni 2.5
422	Blood	DNA	No	Male	Father of 421					T/C	Yes	Illumina Omni 2.5
416	Blood	DNA	No	Male	Father of affected child					T/C	Yes	Illumina Omni 2.5
419	Blood	DNA	Yes	Male	Affected child	36.4286	638 (-5.6)	28 (-8.1)	22 (-7.4)	C/C	Yes	Illumina Omni 2.5	Failed QC - not used in linkage analysis
418	Blood	DNA	No	Female	Mother of 419					T/C	Yes	Illumina Omni 2.5	Not used in linkage analysis
420	Blood	DNA	No	Male	Father of 419					T/C	Yes	Affymetrix 5.0	Not used in linkage analysis
9601	Blood	DNA	No	Female	Mother of affected child					T/C	Yes	Illumina Omni 2.5
9602	Blood	DNA	No	Male	Father of affected child					T/C	Yes	Illumina Omni 2.5
12101	Blood	DNA	Yes	Male	Affected child	Estimated 35	835 (-4.0); by pre-delivery ultrasound	Not available	19.3 (-8.5); by pre-delivery ultrasound	C/C	Yes	Illumina Omni 2.5		Yes
12102	Blood	DNA	No	Female	Mother of 12101					T/C	Yes	Illumina Omni 2.5
12102	Cell line	RNA	No	Female	Mother of 12101																Yes	2 independent cell line cultures (103 M and 99 M reads)	Yes
12103	Blood	DNA	No	Male	Father of 12101					T/C	Yes	Illumina Omni 2.5		Yes
12601	Blood	DNA	Yes	Female	Affected child	38.5714	1300 (-5.3)	30.5 (-7.8)	24.5 (-6.7)	C/C	Yes	Illumina Omni 2.5		Yes					Yes	173 Gb
12602	Blood	DNA	No	Female	Mother of 12601					T/C	Yes	Illumina Omni 2.5
12603	Blood	DNA	No	Male	Father of 12601					T/C	Yes	Illumina Omni 2.5
13001	Blood	DNA	Yes	Male	Affected child	37.2857	1280 (-4.3)	32 (-6.9)	24 (-6.5)	C/C	Yes	Illumina Omni 2.5			Yes	172 M reads	Yes	38 M reads
13002	Blood	DNA	No	Female	Mother of 13001					T/C	Yes	Illumina Omni 2.5
13002	Cell line	RNA	No	Female	Mother of 13001																Yes	2 independent cell line cultures (93 M and 192 M reads)	Yes
15203	Blood	DNA	Yes	Female	Affected child	38.2857	1190 (-5.6)	Not available	Not available	C/C	Yes	Illumina Omni 2.5
15203	Umbilical cord (fresh-frozen)	RNA	Yes	Female	Affected child																Yes	105 M reads	Yes
15203	Blood	RNA	Yes	Female	Affected child																Yes	102 M reads	Yes
15204	Blood	DNA	Yes	Female	Affected child	33	922 (-2.6)	30 (-4.8)	25 (-3.2)	C/C
15204	Blood	RNA	Yes	Female	Affected child																Yes	105 M reads	Yes
15204	Adrenal (RNAlater)	RNA	Yes	Female	Affected child																		Yes
15204	Brain (RNAlater)	RNA	Yes	Female	Affected child																		Yes
15204	Heart (RNAlater)	RNA	Yes	Female	Affected child																		Yes
15204	Kidney (RNAlater)	RNA	Yes	Female	Affected child																		Yes
15204	Liver (RNAlater)	RNA	Yes	Female	Affected child																		Yes
15204	Thymus (RNAlater)	RNA	Yes	Female	Affected child																		Yes
15204	Adrenal (fresh-frozen)	RNA	Yes	Female	Affected child																		Yes
15204	Brain (fresh-frozen)	RNA	Yes	Female	Affected child																Yes	2 independent samples (96 M and 102 M reads)	Yes	2 independent samples
15204	Heart (fresh-frozen)	RNA	Yes	Female	Affected child																		Yes
15204	Kidney (fresh-frozen)	RNA	Yes	Female	Affected child																Yes	100 M reads	Yes
15204	Liver (fresh-frozen)	RNA	Yes	Female	Affected child																		Yes
15204	Thymus (fresh-frozen)	RNA	Yes	Female	Affected child																Yes	97 M reads	Yes
15204	Umbilical cord (fresh-frozen)	RNA	Yes	Female	Affected child																Yes	94 M reads	Yes
15201	Blood	DNA	No	Female	Mother of 15203 and 15204					T/C	Yes	Illumina Omni 2.5
15201	Blood	RNA	No	Female	Mother of 15203 and 15204																Yes	102 M reads	Yes	2 independent blood samples
15201	Cell line	RNA	No	Female	Mother of 15203 and 15204																		Yes
15202	Blood	DNA	No	Male	Father of 15203 and 15204					T/C	Yes	Illumina Omni 2.5
15202	Blood	RNA	No	Male	Father of 15203 and 15204																Yes	106 M reads	Yes	2 independent blood samples
15202	Cell line	RNA	No	Male	Father of 15203 and 15204																		Yes
15601	Cheek swab	DNA	Yes	Female	Affected child	33.5714	900 (-3.0)	30 (-5.1)	24 (-11.8); at 2.5mo old, corrected for prematurity	C/C	Yes	Illumina Omni 2.5
15601	Blood	RNA	Yes	Female	Affected child																Yes	104 M reads	Yes
15602	Cheek swab	DNA	No	Female	Mother of 15601					T/C	Yes	Illumina Omni 2.5
15602	Cell line	RNA	No	Female	Mother of 15601																		Yes
15603	Cheek swab	DNA	No	Male	Father of 15601					T/C	Yes	Illumina Omni 2.5
15603	Cell line	RNA	No	Male	Father of 15601																		Yes
15801	Blood	DNA	Yes	Female	Affected child	34	810 (-3.6)	Not available	Not available	C/C
15801	Umbilical cord (fresh-frozen)	RNA	Yes	Female	Affected child																Yes	112 M reads	Yes
Controls
13003	Blood	DNA	No	Male	First Nation unaffected control					T/T
13003	Cell line	RNA	No	Male	First Nation unaffected control																Yes	2 independent cell line cultures (171 M and 126 M reads)	Yes
FU-001	Umbilical cord (fresh-frozen)	RNA	No	Male	Unrelated control					T/T											Yes	199 M reads	Yes
FU-003	Umbilical cord (fresh-frozen)	RNA	No	Female	Unrelated control					T/T											Yes	236 M reads	Yes
FU-004	Umbilical cord (fresh-frozen)	RNA	No	Female	Unrelated control					T/T													Yes
FU-006	Umbilical cord (fresh-frozen)	RNA	No	Male	Unrelated control					T/T													Yes
FU-009	Umbilical cord (fresh-frozen)	RNA	No	Male	Unrelated control					T/T											Yes	107 M reads	Yes
HI-1400	Cell line (AGRE control)	RNA	No	Male	Unrelated control					T/T											Yes	2 independent cell line cultures (120 M and 140 M reads)	Yes
HI-2185	Cell line (AGRE control)	RNA	No	Female	Unrelated control					T/T											Yes	2 independent cell line cultures (139 M and 115 M reads)	Yes
Clontech human RNA	Adrenal	RNA	No	N/A	Unrelated control																		Yes
Clontech human RNA	Brain	RNA	No	N/A	Unrelated control																Yes	105 M reads	Yes
Clontech human RNA	Brain (fetal)	RNA	No	N/A	Unrelated control																Yes	103 M reads	Yes
Clontech human RNA	Cerebellum	RNA	No	N/A	Unrelated control																		Yes
Clontech human RNA	Heart	RNA	No	N/A	Unrelated control																		Yes
Clontech human RNA	Kidney	RNA	No	N/A	Unrelated control																Yes	147 M reads	Yes
Clontech human RNA	Liver	RNA	No	N/A	Unrelated control																		Yes
Clontech human RNA	Liver (fetal)	RNA	No	N/A	Unrelated control																		Yes
Clontech human RNA	Lung	RNA	No	N/A	Unrelated control																		Yes
Clontech human RNA	Small intestine	RNA	No	N/A	Unrelated control																		Yes
Clontech human RNA	Spleen	RNA	No	N/A	Unrelated control																		Yes
Clontech human RNA	Thymus	RNA	No	N/A	Unrelated control																Yes	132 M reads	Yes
